# Supplementary material for: A 5-bp Insertion in Mip Causes Recessive Congenital Cataract in KFRS4/Kyo Rats
Source: PLoS One. 2012 Nov 30;7(11):e50737. doi: 10.1371/journal.pone.0050737 (PMC3511373; doi:10.1371/journal.pone.0050737)
Supplement: Table S1 — Microsatellite markers used in genetic mapping of the rat kfrs4 locus. (XLSX) [file pone.0050737.s004.xlsx]

## Sheet: Sheet1
Table S1. Microsatellite markers used in genetic mapping of the rat kfrs4 locus.
Chr	Marker		Position				Chr	Marker		Position
1		D1Rat5	10818666	-	10818827		8		D8Rat16	98878558	-	98878727
1		D1Rat20	48777690	-	48777853		8		D8Rat8	117988094	-	117988418
1		D1Rat410	87625119	-	87625270		9		D9Rat132	11099462	-	11099609
1		D1Rat214	100034565	-	100034664		9		D9Rat158	23881722	-	23881993
1		D1Rat320	119536685	-	119536913		9		D9Rat22	52292953	-	52293093
2		D2Rat187	178078	-	178209		9		D9Mit3	55475966	-	55476135
2		D2Rat253	25663275	-	25663463		9		D9Mit7	87490923	-	87491097
2		D2Rat287	199883673	-	199883885		10		D10Rat198	14824852	-	14825065
2		D2Rat222	145318604	-	145318823		10		D10Rat104	41968132	-	41968305
2		D2Rat52	200866668	-	200866813		10		D10Rat93	81887168	-	81887390
2		D2Rat88	222281737	-	222281876		11		D11Rat52	6229317	-	6229477
2		D2Rat250	249990265	-	249990446		11		D11Rat21	25035084	-	25035273
3		D3Rat56	3577906	-	3578102		11		D11Rat97	35072773	-	35072900
3		D3Rat193	10016017	-	10016173		11		D11Rat63	67659790	-	67659992
3		D3Rat169	unknown				11		D11Arb4	68234775	-	68235010
3		D3Rat34	74394822	-	74394967		11		D11Rat92	76129817	-	76129943
3		D3Rat176	81470283	-	81470426		12		D12Arb13	7382722	-	7382953
3		D3Arb10	88944877	-	88945187		12		D12Rat15	29369537	-	29369703
3		D3Rat204	101934371	-	101934633		13		D13Rat5	8292944	-	8293105
3		D3Mit2	143214619	-	143214737		13		D13Rat1	10555731	-	10556042
3		D3Rat114	149496486	-	149496698		13		D13Rat21	43835058	-	43835207
4		D4Rat17	45810174	-	45810272		14		D14Rat1	4895895	-	4896036
4		D4Arb10	61646623	-	61647018		14		D14Rat75	12118228	-	12118490
4		D4Rat48	unknown				14		D14Rat78	17564856	-	17564965
4		D4Mgh18	128179958	-	128180046		14		D14Rat7	24684071	-	24684244
4		D4Arb15	158101749	-	158101963		14		D14Rat45	70233190	-	70233365
4		D4Mgh13	181442881	-	181443052		14		D14Rat110	107119264	-	107119581
5		D5Rat116	1220774	-	1221009		15		D15Rat17	45042675	-	45042874
5		D5Rat128	unknown				16		D16Rat80	14559475	-	14559634
5		D5Rat147	86116639	-	86116811		16		D16Mit5	unknown
5		D5Rat98	100017061	-	100017265		16		D16Rat85	12513036	-	12513180
5		D5Rat71	115431931	-	115432142		16		D16Arb9	18114539	-	18114756
5		D5Rat95	130642376	-	130642474		16		D16Wox10	18121278	-	18121390
5		D5Rat36	145186818	-	145187033		16		D16Mgh9	26915621	-	26915869
6		D6Rat62	5533081	-	5533298		16		D16Rat102	34614773	-	34614907
6		D6Rat149	7161391	-	7161540		16		D16Rat19	35339930	-	35340162
6		D6Mit1	98840517	-	98840644		16		D16Mgh5	50266029	-	50266190
6		D6Rat12	114032010	-	114032160		16		D16Rat65	61786275	-	61786423
6		D14Mgh4	138229582	-	138229831		16		D16Rat53	66606253	-	66606369
7		D7Mgh11	2026569	-	2026705		16		D16Rat23	69487513	-	69487718
7		D7Rat39	4936704	-	4936848		16		D16Rat14	75400761	-	75400894
7		D7Wox43	10129572		10129731		17		D17Rat76	13930241	-	13930458
7		D7Got4	10169231	-	10169371		17		D17Rat8	27619001	-	27619168
7		D7Uwm1	19259382	-	19259619		17		D17Arb4	40683664	-	40683905
7		D7Got17	28488437	-	28488625		18		D18Rat62	6934493	-	6934762
7		D7Got31	39557830	-	39557975		18		D18Mit1	12406975	-	12407219
7		D7Rat164	69506937	-	69507070		18		D18Rat137	53987908	-	53988134
7		D7Got56	79283387	-	79283565		18		D18Arb6	58484894	-	58485101
7		D7Rat184	unknown				19		D19Rat28	5035159	-	5035340
7		D7Rat42	88994909	-	88995082		19		D19Rat97	9939385	-	9939600
7		D7Rat128	121523978	-	121524220		19		D19Rat11	31605038	-	31605157
7		D7Rat81	129500285	-	129500555		19		D19Rat2	55455213	-	55455363
8		D8Rat184	64617024	-	64617185		20		D20Rat46	3040047	-	3040188
8		D8Rat184	64617024	-	64617185		20		D20Arb10	52214730	-	52214999

## Sheet: Sheet2
Table 2 Microsatellite markers within cataract gene of human and mouse developed in this study.
Chr	Gene symbol	Marker name	Product size	Base repeat	Position*	Primer sequence (5' - 3')
2	Cht	Cht_'3	180	CA	256087575	TGGGTTAATGGAACAAAGCAG
					256062589	GTTGGGAGTTTCTCTCCATCC
3	B2m	B2m_'3	202	TC	108937294	TTGAATCTGCATTTCCCATAAC
					108937477	TACATCATCCTCTGGCCTCTG
7	Mip	Mip_'3	303	CA	1526125	CAGGAAGATCCTAGGGCTCAG
					1526410	ATCTGCACATGTTCCCTTCC
15	Gja3**	Gja3_'3	278	GT	36056417	GAGATTGAGCATCGTGGTTAGG
					36056157	AAGGCTCCAGTCCAATAGTCAC
17	Gcnt2	Gcnt2_'3	407	GT	29779154	GATGTCCGGAGAGAAATTAGG
					29779539	GAAGACGATATCTGGCCTCTTG
19	HSf4	HSf4_'5	302	GT	35071824	TATCAGAAGAGGCCTGAAGAGG
					35072104	GTGGGTCCCTAGGAGTTTAAGG
X	Nhs	Nhs_'3	338	GT	53711619	CCAAGAACTCCTCTGTGTGTTC
					53711935	CTGGGCTCCCTGAAACTGATAC
* Positions are accroding to the published genomic sequence (Ensembl).
** reverse strand

## Sheet: Sheet3
Table 1 Primer and PCR condition used for the amplification gene (a), mutation analysis (b), semi and quantitative RT-PCR (C), of Mip/Aqp0 gene in this study.
Experiment	primer name	primer sequence('5 - '3)	position*	Polymerase	Cycle condition of PCR
a	Mip_seq_F	TATTAGGGACCCAGGCACTGTGATTGC	1509031	KOD FX (TOYOBO)	94°C →(98°C → 68°C) 40cycles
	Mip_seq_R	TCCCCACAGTCTCTTTCTTCATCCAAGG	1514715
b	Mip_F1	CTGTCCGAGGAAACCTAGCACTC	1509405
	Mip_F2	TTTCCTGGGAACTGGAC	1510119
	Mip_F3	TACGGGCTGTACAGAAG	1510829
	Mip_F4	TTCCCTGAAGAGTTCTG	1514494
	Mip_R1	GCAAAGATGCAGAGCAC	1510266
	Mip_R2	TGAGCAGGCATGTCAAG	1509476
c	qRT_MipF	GTTGCATTCACGACTGGTTG	1514814	QuantiTect SYBR	95°C →(95°C → 60°C→72°C) 55cycles
	qRT_MipR	CTATGCCCGCAAACTCAGAC	1514913	Green kit (Qiagen)
* Positions are accroding to the published Mip/Aqp0 genomic sequence (Ensembl).

## Sheet: Sheet4
Table 2 Confirmation of cataractogenesis in KFRS4 and F1 progenies.
Progeny	n	weeks of age	affect	unaffect
KFRS4	55	8	55	0
KFRS4 x DOB	33	12	0	33
KFRS4 x DOB	3	44	0	3
KFRS4 x BN	2	14	0	2
KFRS4 x WI	16	19	0	16
