# Supplementary material for: A 5-bp Insertion in Mip Causes Recessive Congenital Cataract in KFRS4/Kyo Rats
Source: PLoS One. 2012 Nov 30;7(11):e50737. doi: 10.1371/journal.pone.0050737 (PMC3511373; doi:10.1371/journal.pone.0050737)
Supplement: Table S2 — Primers and PCR conditions used for the genetic mapping, mutation analysis, and qPCR in this study. (XLSX) [file pone.0050737.s005.xlsx]

## Sheet: Sheet1
Table S2. Primers and PCR conditions used for the genetic mapping, mutation analysis, and quantitative RT-PCR (qPCR) in this study.
Experiment	Gene	Primer name	Primer sequence (5' - 3')	Position*	Expected product size (bp)	Template	Polymerase or kit (Supplier)	Cycle condition of PCR
Genetic mapping	Cwf19l2	Cwf19l2_MS_F	ACAGCTGCAGGACATAATGTTGACAG	437691-437655	168	Genomic DNA	KAPA2G Fast PCR Kit (Kapa Biosystems, Woburn, MA)	95 °C, 2 min → (95 °C, 10 s; 60 °C, 10 s; 72 °C, 5 s) 40 cycles
		Cwf19l2_MS_R	AGAGCACTTGCCTAGCAAGCACAAG	437823-437798
	Rbms2	Rbms2_MS_F	TTAGGTATATACAGAGTTATACTAAG	1467361-1467335	153
		Rbms2_MS_R	AAACTACTTCACATGTCTGAAACC	1467538-1467514
	Mip	Mip_MS_F	CAGGAAGATCCTAGGGCTCAG	1526124-1526145	322
		Mip_MS_R	ATCTGCACATGTTCCCTTCC	1526446-1526426
	Olf1060	Olf1060_MS_F	CCAAGTAACTGTACAAAGTACAAGCAT	7999887-7999913	155
		Olf1060_MS_R	AGTAAATCTCATTAATACTAAGCAACCTG	8000042-8000014
	Zfp347	Zfp347_MS_F	GTGTCTGAAGACAGCTACAATGTGTG	8877088-8877061	150
		Zfp347_MS_R	CAACACTTTTCACCAAATACTGTTATG	8877238-8877212
	Ankrd24	Ankrd24_MS_F	CCTGAAGTCACTCTGCTCATATACAC	9570803-9570776	149
		Ankrd24_MS_R	ACATATCCACATCCTCAGGTGAAC	9570952-9570929
Mutation analysis	Mip	Mip_F	TATTAGGGACCCAGGCACTGTGATTGC	1509031-1509057	5684	Genomic DNA	KOD-FX (TOYOBO, Osaka, Japan)	94 °C for 2 min → (98 °C for 10 s, 68 °C for 8 min) 40 cycles
		Mip_R	TCCCCACAGTCTCTTTCTTCATCCAAGG	1514715-1514688
		Mip_F1**	CTGTCCGAGGAAACCTAGCACTC	1509405-1509427
		Mip_F2**	TTTCCTGGGAACTGGAC	1510119-1510135
		Mip_F3**	TACGGGCTGTACAGAAG	1510829-1510845
		Mip_F4**	TTCCCTGAAGAGTTCTG	1514494-1514510
		Mip_R1**	GCAAAGATGCAGAGCAC	1510266-1510250
		Mip_R2**	TGAGCAGGCATGTCAAG	1509476-1509460
		Mip_del_F***	CTGTACAGTGTCACCCCACCAG	1509358-1509380	104 or 108	Genomic DNA	KAPA2G Fast PCR Kit	95 °C, 2 min → (95 °C, 10 s; 60 °C, 10 s; 72 °C, 5 s) 40 cycles
		Mip_del_R***	GTCAAGGCAACAGTCAGGACAC	1509483-1509461
qRT-PCR	Cryaa	Cryaa_F	GTCATCTTCTTGGATGTGAAGCAC	226-249	118	cDNA	QuantiFast SYBR green PCR Kit (Qiagen, Valencia, CA)	Manufacture's protocol
		Cryaa_R	GAAATGTAGCCATGGTCATCCTG	344-322
	Crygb	Crygb_F	CAACACTCGGGCACTTACAGAATGA	283-307	177
		Crygb_R	CCCTCTGTAGCTAGGCATCTCATAG	459-435
	Crygd	Crygd_F	CAGACTGTACGAGAGGGAAGATTAC	312-336	102
		Crygd_R	AGGGAGTAGATCTCATTGAAGTGG	413-390
	Casp6	Casp6_F	AACCTGACTCGAAGGTTCTCAGAG	352-375	116
		Casp6_R	GGAAGTCGACACCTCGTGAATCTT	453-430
	Lim2	Lim2_F	TCATGACCTTCTTTGCAGGAATTTTC	488-513	115
		Lim2_R	GTTGTAACTTCCGGCTGCAAGTTT	602-579
	Bfsp1	Bfsp1_F	TGAGATTGAAGGCAACAGGTTGAGC	930-954	121
		Bfsp1_R	CACAGCCCTGGTAAGATCTTTCACA	1050-1026
	Bfsp2	Bfsp2_F	AGAGGTAGTCCATGTATCCCAGACC	962-988	148
		Bfsp2_R	AAGGTGTTTTCCAGGCCTCGTTTCAG	1109-1083
	Gja3	Gja3_F	GGTTGCCACCTTATTACACACAC	1022-1044	109
		Gja3_R	TTTAGGGTCACCACTGTGAAGTC	1130-1108
	Gja8	Gja8_F	GCTACCAGCTCCTAGAAGAAGAG	892-914	101
		Gja8_R	AGACTCAAGGTATATTGGCACCAGC	1481-1457
*Positions are according to the published Mip genomic sequence (Ensembl Gene ID: ENSRNOG00000003132), and Cryaa (NM_012534), Crygb (NM_001109875), Crygd (NM_033095), Casp6 (NM_031775), Lim2 (NM_053771), Bfsp1 (NM_031555), Bfsp2 (XM_003750577), Gja3 (NM_024376), and Gja8 (NM_153465) mRNA sequence.
**Primers used for sequencing
***Primers used for genotyping of kfrs4 mutation
